# Supplementary material for: Survival Advantage of Both Human Hepatocyte Xenografts and Genome-Edited Hepatocytes for Treatment of α-1 Antitrypsin Deficiency
Source: PubMed Central journal article supplement — Mol Ther. 2017 Sep 25;25(11):2477–89. doi: 10.1016/j.ymthe.2017.09.020 (PMC5675605; doi:10.1016/j.ymthe.2017.09.020), 2017-09-25
Supplement: mmc1.pdf [file mmc1.pdf]

YMTHE, Volume 25

## **Supplemental Information**

**Survival Advantage of Both Human Hepatocyte**

**Xenografts and Genome-Edited Hepatocytes**

**for Treatment of  $\alpha$ -1 Antitrypsin Deficiency**

**Florie Borel, Qiushi Tang, Gwladys Gernoux, Cynthia Greer, Ziqiong Wang, Adi Barzel, Mark A. Kay, Leonard D. Shultz, Dale L. Greiner, Terence R. Flotte, Michael A. Brehm, and Christian Mueller**

**Table S1. Wild-type hepatocytes expand faster than hepatocytes expressing Z-AAT (PiZ).**

| Genotype of host mouse | Genotype of implanted hepatocytes | Treatment | Animal # | % GFP (ddPCR) |      | % GFP (IHC) |      |
|------------------------|-----------------------------------|-----------|----------|---------------|------|-------------|------|
|                        |                                   |           |          |               |      |             |      |
| NSG-PiZ                | PiZ-GFP                           | S+PHx     | 832      | 9.8           | 7.7  | 14          | 11.3 |
|                        |                                   |           | 848      | 2.7           |      | 12          |      |
|                        |                                   |           | 849      | 10.7          |      | 7           |      |
|                        |                                   | S         | 833      | 4.5           | 5.4  | 16          | 11.7 |
|                        |                                   |           | 834      | 8.5           |      | 11          |      |
|                        |                                   |           | 835      | 3.1           |      | 8           |      |
|                        | WT-GFP                            | S+PHx     | 838      | 42.2          | 31.9 | 43          | 44.5 |
|                        |                                   |           | 840      | 21.6          |      | 46          |      |
|                        |                                   | S         | 841      | 34.7          | 39.3 | 50          | 48.2 |
|                        |                                   |           | 842      | 39.4          |      | 47          |      |
|                        |                                   |           | 843      | 45.3          |      | 47          |      |
|                        |                                   |           | 844      | 37.7          |      | 48          |      |
| B6-GFP                 | None                              | None      | NA       | 94.8          | 97.5 | NA          | NA   |
|                        |                                   |           | NA       | 100.2         |      | NA          |      |

NSG: NOD-*scid*-gamma, B6: C57BL/6, PiZ: protease inhibitor Z, GFP: green fluorescent protein, WT: wild-type, S: splenic injection only, S+PHx: splenic injection and partial hepatectomy, ddPCR: droplet digital polymerase chain reaction, IHC: immunohistochemistry, NA: not available.

### Mouse Liver

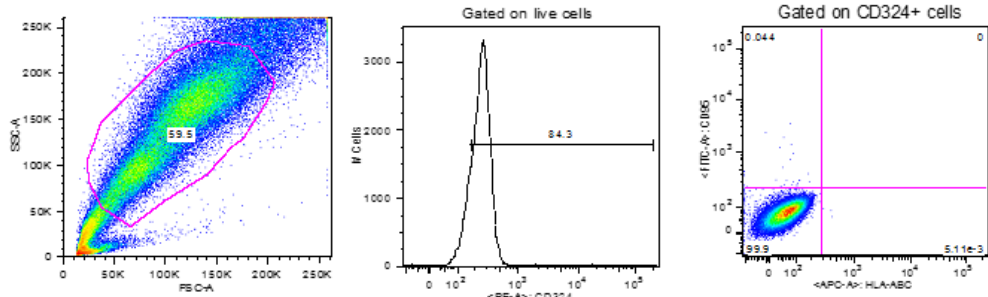

### Humanized Mouse Liver

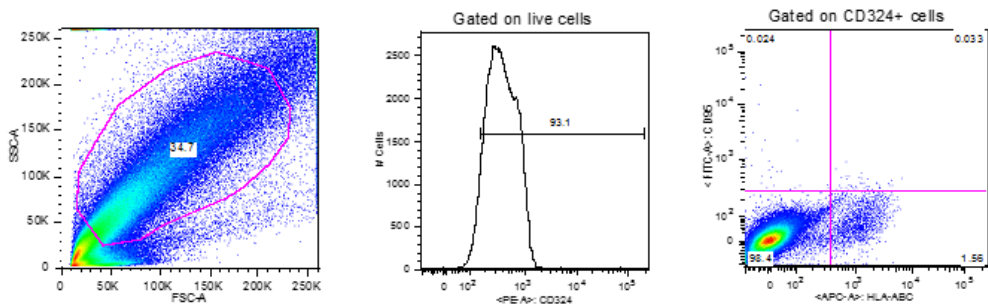

**Figure S1. Human specificity of anti-HLA antibody.** Mouse liver (upper panel) and humanized mouse liver engrafted with human hepatocytes (lower panel) were dissociated and stained with anti-CD324, anti-CD95 and anti-HLA-ABC antibodies. Hepatocytes were gated as CD324<sup>+</sup> cells and human hepatocytes as CD95<sup>-</sup>HLA-ABC<sup>+</sup> cells within the CD324<sup>+</sup> gate. Human hepatocytes (CD324<sup>+</sup>CD95<sup>-</sup>HLA-ABC<sup>+</sup>) are detected only in humanized mouse liver confirming the specificity of the anti-HLA-ABC antibody for human cells.
